# Supplementary material for: Hyperspectral Imaging and the Retina: Worth the Wave?
Source: PubMed Central journal article supplement (PMC7442879; doi:10.1167/tvst.9.9.9), 2020-08-05
Supplement: tvst-9-9-9_s001.pdf [file tvst-9-9-9_s001.pdf]

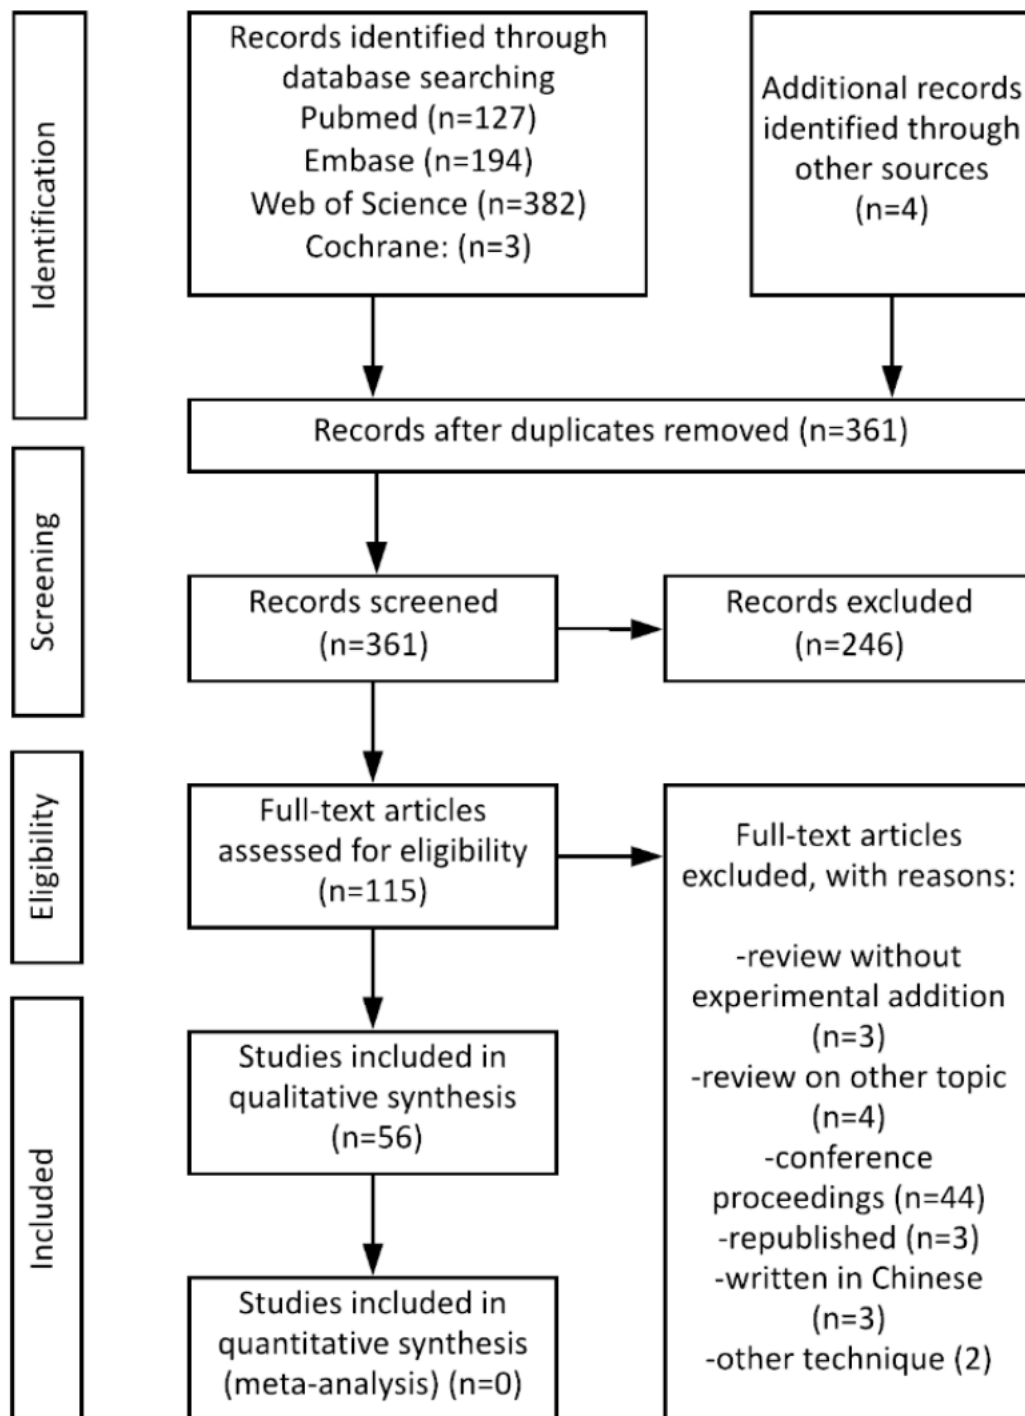

**Fig. S1.** Literature search: PRISMA Consort flow diagram.

n: number of articles. According to The PRISMA Statement 2009.<sup>38</sup>
